# Supplementary material
Source: publisher figshare collection journal article supplement (https://tandf.figshare.com/ndownloader/files/25468424)
Supplement: Supplementary file 1 [file 25468424]

**Appendix 4.** The significance of the rank order of the themes as generated by the perceived *likelihood of use* rating data (participant groups combined) were examined using independent t-tests, with Bonferroni corrected *p-values* below 0.0023 indicating significance. Significant differences are in bold type.

| Themes | Facilitating peer and other professional support (mean 2.69; SD 1.10) | Including communication partners  (mean 3.09; SD 1.13) | Improving social engagement with technology  (mean 3.41; SD 0.98) | Client empowerment (mean 3.50; SD 0.99) | Use of strategies and training to personalising the rehabilitation program  (mean 3.60; SD 0.88) | Promoting client responsibility  (mean 3.76; SD 0.85) |
| --- | --- | --- | --- | --- | --- | --- |
| Including communication partners  (mean 3.09; SD 1.13) | 0.050 |  |  |  |  |  |
| Improving social engagement with technology  (mean 3.41; SD 0.98) | **<0.001** | 0.106 |  |  |  |  |
| Client empowerment (mean 3.50; SD 0.99) | **<0.001** | 0.041 | 0.630 |  |  |  |
| Use of strategies and training to personalising the rehabilitation program  (3.60; SD 0.88) | **<0.001** | 0.007 | 0.257 | 0.534 |  |  |
| Promoting client responsibility  (mean 3.76; SD 0.85) | **<0.001** | **<0.001** | 0.036 | 0.115 | 0.312 |  |
| Providing emotional support  (mean 3.95; SD 0.85) | **<0.001** | **<0.001** | **0.002** | 0.008 | 0.030 | 0.229 |
